# Supplementary material for: The reversing association between advanced maternal age and child cognitive ability: evidence from three UK birth cohorts
Source: Oxford University Press journal article supplement (doi:10.1093/ije/dyw354), 2016-11-29
Supplement: supplementary_appendix_dyw354.docx [file supplementary_appendix_dyw354.docx]

**Appendix**

**Detailed information on the pooling procedure to create Table 5**

The primary task when pooling survey data is to find a way of accounting for the differences in survey design. The 1958/1970 and the 2001 cohorts were substantially different with respect to their sampling schemes. As was discussed in the text, the 1958 and 1970 cohorts surveyed the entire population of the births that occurred in a particular week of March 1958 and April 1970, respectively. By contrast, the population of the 2001 cohort was meant to be representative of babies born in the UK during roughly one year within the 2000-2001 period. In addition, the 2001 has a complex survey design, including the multi-stage sampling and oversampling of certain groups. In order to pool the data we made the following adjustments and assumptions: we first adopted the view that the 1958 and 1970 cohorts were sampled from a larger population; namely, all of the babies born during the whole of March 1958 and April 1970, respectively. This rests on the assumption that the births during the actual week of March 1958/April 1970 did not differ systematically from the other births during March 1958/April 1970. The effect of viewing the 1958/1970 as sampling from a larger population necessitates the usage of (grossing up) weights with a value of four. All of the births were assigned to a common stratum, but each one received its own primary sampling unit. For the 2001 cohort, we applied the unaltered settings of its complex survey design, with the exception of grossing up the weights in order to make the survey population size equal to the number of babies born in the UK in the year 2000. The values for the finite population correction for the 2001 cohort were not changed, and the corresponding values for the 1958/1970 cohort studies’ observations were set to 1/4. Based on these settings, the standard errors were calculated using a nonparametric bootstrap with 1000 replications. In order to generate replicate weights for the pooled data, we made use of the Stata module bsweights (Kolenikov, 2010)[[1]](#endnote-1). We reported confidence intervals based on percentile calculations of the distribution of the bootstrap parameter estimates. As a robustness check we repeated the same estimation by grossing up 1958/1970 observations to the entire year of 1958/1970. The results remained unchanged.

1. KOLENIKOV, S. 2010. Resampling Variance Estimation for Complex Survey Data. *The Stata Journal,* 10**,** 165-199. [↑](#endnote-ref-1)
