# Supplementary material for: The reversing association between advanced maternal age and child cognitive ability: evidence from three UK birth cohorts
Source: Oxford University Press journal article supplement (doi:10.1093/ije/dyw354), 2016-11-29
Supplement: supplementary_appendix_table_1_dyw354.xlsx [file supplementary_appendix_table_1_dyw354.xlsx]

## Sheet: Appendix Table 1 
Appendix Table 1: OLS models regressing cognitive ability on maternal age at birth and child and family characteristics. Coefficients with 95% confidence intervals
1958 (n=10,969)					1970 (n=9362)				2001 (n=11,600)
	Model 1: Baselinea	Model 2: baseline + Birth order b	Model 3: Baseline + birth order + socio-demographic characteristics c		Model 1: Baselinea	Model 2: baseline + Birth order b	Model 3: Baseline + birth order + socio-demographic characteristics c		Model 1: Baselinea	Model 2: baseline + Birth order b	Model 3: Baseline + birth order + socio-demographic characteristics c
Maternal age <20	-0.314***	-0.538***	-0.348***		-0.354***	-0.566***	-0.289***		-0.288***	-0.433***	-0.171***
	(-0.403 , -0.225)	(-0.628 , -0.449)	(-0.435 , -0.260)		(-0.431 , -0.277)	(-0.646 , -0.487)	(-0.373 , -0.205)		(-0.376 , -0.199)	(-0.525 , -0.342)	(-0.267 , -0.074)
Maternal age 20-24	-0.127***	-0.244***	-0.151***		-0.150***	-0.254***	-0.107***		-0.240***	-0.279***	-0.131***
	(-0.175 , -0.080)	(-0.291 , -0.196)	(-0.197 , -0.105)		(-0.198 , -0.101)	(-0.303 , -0.205)	(-0.156 , -0.059)		(-0.307 , -0.173)	(-0.348 , -0.210)	(-0.201 , -0.061)
Maternal age 30-34	-0.002	0.118***	0.096***		-0.045	0.074**	0.059*		0.106***	0.145***	0.041
	(-0.053 , 0.050)	(0.067 , 0.170)	(0.047 , 0.146)		(-0.108 , 0.017)	(0.011 , 0.136)	(-0.001 , 0.119)		(0.055 , 0.157)	(0.094 , 0.196)	(-0.010 , 0.092)
Maternal age 35-39	-0.063*	0.142***	0.129***		-0.115**	0.052	0.035		0.162***	0.243***	0.101***
	(-0.128 , 0.003)	(0.076 , 0.208)	(0.065 , 0.192)		(-0.205 , -0.025)	(-0.038 , 0.142)	(-0.051 , 0.121)		(0.093 , 0.231)	(0.177 , 0.309)	(0.040 , 0.162)
Maternal age 40+	-0.117*	0.124**	0.098*		-0.082	0.094	0.095		0.084	0.208***	0.051
	(-0.238 , 0.004)	(0.004 , 0.243)	(-0.017 , 0.213)		(-0.239 , 0.076)	(-0.062 , 0.250)	(-0.054 , 0.244)		(-0.073 , 0.242)	(0.056 , 0.360)	(-0.095 , 0.196)
Girl	0.233***	0.235***	0.230***		-0.146***	-0.153***	-0.159***		-0.085***	-0.079***	-0.076***
	(0.196 , 0.270)	(0.199 , 0.271)	(0.195 , 0.264)		(-0.186 , -0.106)	(-0.192 , -0.113)	(-0.196 , -0.121)		(-0.127 , -0.042)	(-0.121 , -0.037)	(-0.117 , -0.036)
Multiple birth	-0.256***	-0.244***	-0.210**		-0.191*	-0.176*	-0.074		0.003	-0.031	-0.004
	(-0.429 , -0.083)	(-0.412 , -0.075)	(-0.371 , -0.049)		(-0.388 , 0.006)	(-0.369 , 0.017)	(-0.258 , 0.111)		(-0.188 , 0.194)	(-0.214 , 0.152)	(-0.180 , 0.172)
First order birth (reference: third or higher order birth)		0.608***	0.454***			0.548***	0.339***			0.473***	0.280***
		(0.558 , 0.658)	(0.405 , 0.502)			(0.491 , 0.604)	(0.283 , 0.396)			(0.405 , 0.541)	(0.219 , 0.342)
Second order birth		0.399***	0.281***			0.327***	0.193***			0.275***	0.156***
		(0.351 , 0.447)	(0.235 , 0.327)			(0.273 , 0.380)	(0.141 , 0.245)			(0.209 , 0.340)	(0.097 , 0.216)
Mother was single at birth			-0.096				-0.004				0.008
			(-0.239 , 0.047)				(-0.082 , 0.075)				(-0.071 , 0.087)
Mother was cohabiting at birth			N/A				N/A				-0.021
											(-0.082 , 0.039)
Mother stayed in school after minimum leaving age			0.315***				0.283***				0.178***
			(0.271 , 0.358)				(0.239 , 0.326)				(0.130 , 0.227)
Social class II (reference: social class I)			-0.142***				-0.229***				-0.157***
			(-0.242 , -0.042)				(-0.332 , -0.127)				(-0.228 , -0.086)
Father social class III			-0.276***				-0.302***				-0.336***
			(-0.381 , -0.171)				(-0.404 , -0.200)				(-0.424 , -0.247)
Social class III			-0.432***				-0.527***				-0.421***
			(-0.526 , -0.338)				(-0.621 , -0.432)				(-0.517 , -0.326)
Social class VI			-0.539***				-0.614***				-0.442***
			(-0.644 , -0.435)				(-0.717 , -0.510)				(-0.560 , -0.323)
Social class V			-0.757***				-0.800***				-0.724***
			(-0.866 , -0.648)				(-0.922 , -0.678)				(-0.897 , -0.550)
Social class not available, no man in hh, unemployed, sick, dead			-0.491***				-0.768***				-0.512***
			(-0.643 , -0.340)				(-1.078 , -0.457)				(-0.662 , -0.363)
Mother smoked during pregnancy			-0.127***				-0.088***				-0.002
			(-0.164 , -0.089)				(-0.128 , -0.049)				(-0.060 , 0.056)
Mother had antenatal after 12 weeks of pregnancy			-0.044**				-0.083***				-0.059**
			(-0.087 , -0.001)				(-0.122 , -0.045)				(-0.111 , -0.006)
Mother height			0.005***				0.007***				0.001
			(0.002 , 0.008)				(0.004 , 0.010)				(-0.002 , 0.005)
Mother breastfed			0.110***				0.100***				0.096***
			(0.072 , 0.148)				(0.059 , 0.141)				(0.048 , 0.145)
Constant	-0.050***	-0.407***	-0.815***		0.173***	-0.117***	-0.837***		0.059*	-0.244***	-0.121
	(-0.087 , -0.013)	(-0.455 , -0.360)	(-1.276 , -0.354)		(0.133 , 0.214)	(-0.170 , -0.065)	(-1.334 , -0.341)		(-0.004 , 0.122)	(-0.328 , -0.161)	(-0.697 , 0.455)
Number of observations	10969				9362				11600
note: *** p<0.01, ** p<0.05, * p<0.1

## Sheet: Appendix Table 2
Appendix Table 2: % of families in low/high social classes by birth order
	First birth	Second birth	Third or higher	N
	1958
% Low social Class	6.5	8.27	11.85	963
% High Social Class	4.18	4.6	3.01	431
	1970
% Low social Class	5.2	4.97	7.5	540
% High Social Class	4.92	5.23	3.77	440
	2001
% Low social Class	1.91	2.18	3.35	211
% High Social Class	8.11	6.63	4.76	893
